**Table S2. ANOVA (Tukey HSD) for IFC measurements across cell types**

| Dependent Variable |   |   | Mean Difference (I-<br>J) | Std. Error | Sig. |
|--------------------|---|---|---------------------------|------------|------|
| Area_M01           | 1 | 2 | -9.70                     | 9.25       | 0.55 |
|                    |   | 3 | 249.74                    | 9.46       | 0.00 |
|                    | 2 | 3 | 259.44                    | 9.11       | 0.00 |
| Area_M02           | 1 | 2 | 130.04                    | 8.50       | 0.00 |
|                    |   | 3 | 320.14                    | 8.69       | 0.00 |
|                    | 2 | 3 | 190.10                    | 8.37       | 0.00 |
| Area_M03           | 1 | 2 | -247.79                   | 9.43       | 0.00 |
|                    |   | 3 | 126.69                    | 9.65       | 0.00 |
|                    | 2 | 3 | 374.48                    | 9.29       | 0.00 |
| Area_M04           | 1 | 2 | 410.44                    | 9.82       | 0.00 |
|                    |   | 3 | 478.27                    | 10.05      | 0.00 |
|                    | 2 | 3 | 67.83                     | 9.67       | 0.00 |
| Area_M05           | 1 | 2 | -170.81                   | 9.04       | 0.00 |
|                    |   | 3 | 189.54                    | 9.25       | 0.00 |
|                    | 2 | 3 | 360.35                    | 8.90       | 0.00 |
| Area_M06           | 1 | 2 | -362.55                   | 7.21       | 0.00 |
|                    |   | 3 | -6.82                     | 7.38       | 0.63 |
|                    | 2 | 3 | 355.73                    | 7.10       | 0.00 |
| Area_MC            | 1 | 2 | 421.21                    | 9.89       | 0.00 |
|                    |   | 3 | 488.10                    | 10.12      | 0.00 |
|                    | 2 | 3 | 66.88                     | 9.74       | 0.00 |
| Aspect Ratio_M01   | 1 | 2 | -0.24                     | 0.01       | 0.00 |
|                    |   | 3 | -0.01                     | 0.01       | 0.05 |
|                    | 2 | 3 | 0.22                      | 0.01       | 0.00 |
| Aspect Ratio_M02   | 1 | 2 | -0.15                     | 0.00       | 0.00 |
|                    |   | 3 | 0.03                      | 0.00       | 0.00 |
|                    | 2 | 3 | 0.18                      | 0.00       | 0.00 |
| Aspect Ratio_M03   | 1 | 2 | -0.37                     | 0.01       | 0.00 |
|                    |   | 3 | 0.00                      | 0.01       | 0.94 |
|                    | 2 | 3 | 0.37                      | 0.01       | 0.00 |
| Aspect Ratio_M04   | 1 | 2 | -0.13                     | 0.00       | 0.00 |
|                    |   | 3 | 0.00                      | 0.00       | 0.98 |
|                    | 2 | 3 | 0.13                      | 0.00       | 0.00 |
| Aspect Ratio_M05   | 1 | 2 | -0.29                     | 0.01       | 0.00 |
|                    |   | 3 | 0.06                      | 0.01       | 0.00 |
|                    | 2 | 3 | 0.35                      | 0.01       | 0.00 |

|                                 |   |   |       |      |      |
|---------------------------------|---|---|-------|------|------|
| Aspect Ratio_M06                | 1 | 2 | -0.47 | 0.01 | 0.00 |
|                                 |   | 3 | -0.02 | 0.01 | 0.01 |
|                                 | 2 | 3 | 0.44  | 0.01 | 0.00 |
| Aspect Ratio Intensity_M01_Ch01 | 1 | 2 | -0.22 | 0.01 | 0.00 |
|                                 |   | 3 | -0.01 | 0.01 | 0.65 |
|                                 | 2 | 3 | 0.21  | 0.01 | 0.00 |
| Aspect Ratio Intensity_M02_Ch02 | 1 | 2 | -0.14 | 0.01 | 0.00 |
|                                 |   | 3 | 0.03  | 0.01 | 0.00 |
|                                 | 2 | 3 | 0.17  | 0.01 | 0.00 |
| Aspect Ratio Intensity_M03_Ch03 | 1 | 2 | -0.35 | 0.01 | 0.00 |
|                                 |   | 3 | 0.01  | 0.01 | 0.57 |
|                                 | 2 | 3 | 0.35  | 0.01 | 0.00 |
| Aspect Ratio Intensity_M04_Ch04 | 1 | 2 | -0.13 | 0.00 | 0.00 |
|                                 |   | 3 | 0.01  | 0.00 | 0.02 |
|                                 | 2 | 3 | 0.14  | 0.00 | 0.00 |
| Aspect Ratio Intensity_M05_Ch05 | 1 | 2 | -0.27 | 0.01 | 0.00 |
|                                 |   | 3 | 0.06  | 0.01 | 0.00 |
|                                 | 2 | 3 | 0.33  | 0.01 | 0.00 |
| Aspect Ratio Intensity_M06_Ch06 | 1 | 2 | -0.45 | 0.01 | 0.00 |
|                                 |   | 3 | -0.02 | 0.01 | 0.03 |
|                                 | 2 | 3 | 0.43  | 0.01 | 0.00 |
| Contrast_M01_Ch01               | 1 | 2 | -1.38 | 0.31 | 0.00 |
|                                 |   | 3 | -2.51 | 0.31 | 0.00 |
|                                 | 2 | 3 | -1.13 | 0.30 | 0.00 |
| Contrast_M02_Ch02               | 1 | 2 | 1.46  | 0.12 | 0.00 |
|                                 |   | 3 | 0.03  | 0.12 | 0.98 |
|                                 | 2 | 3 | -1.44 | 0.12 | 0.00 |
| Contrast_M03_Ch03               | 1 | 2 | -0.64 | 0.13 | 0.00 |
|                                 |   | 3 | -0.60 | 0.13 | 0.00 |
|                                 | 2 | 3 | 0.04  | 0.13 | 0.95 |
| Contrast_M04_Ch04               | 1 | 2 | -8.05 | 0.22 | 0.00 |
|                                 |   | 3 | -7.57 | 0.23 | 0.00 |
|                                 | 2 | 3 | 0.48  | 0.22 | 0.07 |
| Contrast_M05_Ch05               | 1 | 2 | -1.47 | 0.49 | 0.01 |
|                                 |   | 3 | 1.98  | 0.50 | 0.00 |
|                                 | 2 | 3 | 3.45  | 0.49 | 0.00 |
| Contrast_M06_Ch06               | 1 | 2 | -5.02 | 0.15 | 0.00 |
|                                 |   | 3 | -0.61 | 0.16 | 0.00 |
|                                 | 2 | 3 | 4.41  | 0.15 | 0.00 |

|                       |   |   |            |         |      |
|-----------------------|---|---|------------|---------|------|
| Intensity_MC_Ch01     | 1 | 2 | -213660.99 | 5091.02 | 0.00 |
|                       |   | 3 | 14954.98   | 5209.35 | 0.01 |
|                       | 2 | 3 | 228615.96  | 5014.95 | 0.00 |
| Intensity_MC_Ch02     | 1 | 2 | -96853.14  | 2494.05 | 0.00 |
|                       |   | 3 | 25735.41   | 2552.02 | 0.00 |
|                       | 2 | 3 | 122588.55  | 2456.78 | 0.00 |
| Intensity_MC_Ch03     | 1 | 2 | -37869.30  | 974.95  | 0.00 |
|                       |   | 3 | 10921.89   | 997.61  | 0.00 |
|                       | 2 | 3 | 48791.19   | 960.39  | 0.00 |
| Intensity_MC_Ch04     | 1 | 2 | -38514.55  | 988.11  | 0.00 |
|                       |   | 3 | 3074.35    | 1011.07 | 0.01 |
|                       | 2 | 3 | 41588.90   | 973.34  | 0.00 |
| Intensity_MC_Ch05     | 1 | 2 | -47674.28  | 1292.31 | 0.00 |
|                       |   | 3 | 10759.07   | 1322.34 | 0.00 |
|                       | 2 | 3 | 58433.36   | 1273.00 | 0.00 |
| Intensity_MC_Ch06     | 1 | 2 | -16945.64  | 405.18  | 0.00 |
|                       |   | 3 | 2360.82    | 414.59  | 0.00 |
|                       | 2 | 3 | 19306.46   | 399.12  | 0.00 |
| Mean Pixel_M01_Ch01   | 1 | 2 | -75.78     | 1.51    | 0.00 |
|                       |   | 3 | -3.75      | 1.55    | 0.04 |
|                       | 2 | 3 | 72.03      | 1.49    | 0.00 |
| Mean Pixel_M02_Ch02   | 1 | 2 | -38.66     | 0.88    | 0.00 |
|                       |   | 3 | -0.59      | 0.90    | 0.79 |
|                       | 2 | 3 | 38.08      | 0.87    | 0.00 |
| Mean Pixel_M03_Ch03   | 1 | 2 | -16.67     | 0.37    | 0.00 |
|                       |   | 3 | -0.40      | 0.38    | 0.54 |
|                       | 2 | 3 | 16.27      | 0.37    | 0.00 |
| Mean Pixel_M04_Ch04   | 1 | 2 | -9.54      | 0.27    | 0.00 |
|                       |   | 3 | 2.46       | 0.27    | 0.00 |
|                       | 2 | 3 | 12.00      | 0.26    | 0.00 |
| Mean Pixel_M05_Ch05   | 1 | 2 | -20.06     | 0.57    | 0.00 |
|                       |   | 3 | 0.27       | 0.58    | 0.89 |
|                       | 2 | 3 | 20.33      | 0.56    | 0.00 |
| Mean Pixel_M06_Ch06   | 1 | 2 | -8.63      | 0.21    | 0.00 |
|                       |   | 3 | -0.88      | 0.21    | 0.00 |
|                       | 2 | 3 | 7.75       | 0.21    | 0.00 |
| Median Pixel_M01_Ch01 | 1 | 2 | -72.95     | 1.30    | 0.00 |
|                       |   | 3 | -2.40      | 1.33    | 0.17 |
|                       | 2 | 3 | 70.55      | 1.28    | 0.00 |

|                       |   |   |         |      |      |
|-----------------------|---|---|---------|------|------|
| Median Pixel_M02_Ch02 | 1 | 2 | -39.37  | 0.83 | 0.00 |
|                       |   | 3 | 0.25    | 0.84 | 0.95 |
|                       | 2 | 3 | 39.62   | 0.81 | 0.00 |
| Median Pixel_M03_Ch03 | 1 | 2 | -16.80  | 0.35 | 0.00 |
|                       |   | 3 | -0.07   | 0.36 | 0.98 |
|                       | 2 | 3 | 16.73   | 0.34 | 0.00 |
| Median Pixel_M04_Ch04 | 1 | 2 | -9.19   | 0.25 | 0.00 |
|                       |   | 3 | 3.73    | 0.25 | 0.00 |
|                       | 2 | 3 | 12.91   | 0.24 | 0.00 |
| Median Pixel_M05_Ch05 | 1 | 2 | -19.51  | 0.49 | 0.00 |
|                       |   | 3 | 0.44    | 0.50 | 0.65 |
|                       | 2 | 3 | 19.96   | 0.48 | 0.00 |
| Median Pixel_M06_Ch06 | 1 | 2 | -8.23   | 0.19 | 0.00 |
|                       |   | 3 | -0.72   | 0.19 | 0.00 |
|                       | 2 | 3 | 7.51    | 0.18 | 0.00 |
| Max Pixel_MC_Ch01     | 1 | 2 | -234.61 | 6.92 | 0.00 |
|                       |   | 3 | -15.32  | 7.08 | 0.08 |
|                       | 2 | 3 | 219.29  | 6.81 | 0.00 |
| Max Pixel_MC_Ch02     | 1 | 2 | -92.16  | 2.54 | 0.00 |
|                       |   | 3 | -6.38   | 2.60 | 0.04 |
|                       | 2 | 3 | 85.79   | 2.50 | 0.00 |
| Max Pixel_MC_Ch03     | 1 | 2 | -34.81  | 0.98 | 0.00 |
|                       |   | 3 | -2.86   | 1.00 | 0.01 |
|                       | 2 | 3 | 31.95   | 0.96 | 0.00 |
| Max Pixel_MC_Ch04     | 1 | 2 | -67.13  | 4.32 | 0.00 |
|                       |   | 3 | -75.21  | 4.42 | 0.00 |
|                       | 2 | 3 | -8.08   | 4.25 | 0.14 |
| Max Pixel_MC_Ch05     | 1 | 2 | -53.97  | 1.91 | 0.00 |
|                       |   | 3 | -0.42   | 1.96 | 0.97 |
|                       | 2 | 3 | 53.54   | 1.89 | 0.00 |
| Max Pixel_MC_Ch06     | 1 | 2 | -15.61  | 0.54 | 0.00 |
|                       |   | 3 | -1.99   | 0.55 | 0.00 |
|                       | 2 | 3 | 13.62   | 0.53 | 0.00 |
| Raw Max Pixel_MC_Ch01 | 1 | 2 | -235.09 | 6.92 | 0.00 |
|                       |   | 3 | -15.82  | 7.08 | 0.07 |
|                       | 2 | 3 | 219.27  | 6.81 | 0.00 |
| Raw Max Pixel_MC_Ch02 | 1 | 2 | -92.51  | 2.54 | 0.00 |
|                       |   | 3 | -6.98   | 2.60 | 0.02 |
|                       | 2 | 3 | 85.52   | 2.51 | 0.00 |

|                       |   |   |        |      |      |
|-----------------------|---|---|--------|------|------|
| Raw Max Pixel_MC_Ch03 | 1 | 2 | -35.03 | 0.98 | 0.00 |
|                       |   | 3 | -2.81  | 1.00 | 0.01 |
|                       | 2 | 3 | 32.22  | 0.96 | 0.00 |
| Raw Max Pixel_MC_Ch04 | 1 | 2 | -66.87 | 4.37 | 0.00 |
|                       |   | 3 | -82.78 | 4.47 | 0.00 |
|                       | 2 | 3 | -15.91 | 4.30 | 0.00 |
| Raw Max Pixel_MC_Ch05 | 1 | 2 | -54.04 | 1.92 | 0.00 |
|                       |   | 3 | -0.53  | 1.96 | 0.96 |
|                       | 2 | 3 | 53.51  | 1.89 | 0.00 |
| Raw Max Pixel_MC_Ch06 | 1 | 2 | -15.80 | 0.54 | 0.00 |
|                       |   | 3 | -2.23  | 0.55 | 0.00 |
|                       | 2 | 3 | 13.57  | 0.53 | 0.00 |
| Raw Min Pixel_MC_Ch01 | 1 | 2 | -3.63  | 0.07 | 0.00 |
|                       |   | 3 | -0.75  | 0.07 | 0.00 |
|                       | 2 | 3 | 2.88   | 0.07 | 0.00 |
| Raw Min Pixel_MC_Ch02 | 1 | 2 | -2.44  | 0.05 | 0.00 |
|                       |   | 3 | -1.05  | 0.05 | 0.00 |
|                       | 2 | 3 | 1.38   | 0.05 | 0.00 |
| Raw Min Pixel_MC_Ch03 | 1 | 2 | -1.66  | 0.04 | 0.00 |
|                       |   | 3 | -0.17  | 0.04 | 0.00 |
|                       | 2 | 3 | 1.49   | 0.04 | 0.00 |
| Raw Min Pixel_MC_Ch04 | 1 | 2 | 22.89  | 2.80 | 0.00 |
|                       |   | 3 | -0.89  | 2.86 | 0.95 |
|                       | 2 | 3 | -23.78 | 2.75 | 0.00 |
| Raw Min Pixel_MC_Ch05 | 1 | 2 | -2.05  | 0.05 | 0.00 |
|                       |   | 3 | -0.64  | 0.05 | 0.00 |
|                       | 2 | 3 | 1.41   | 0.05 | 0.00 |
| Raw Min Pixel_MC_Ch06 | 1 | 2 | -1.98  | 0.05 | 0.00 |
|                       |   | 3 | -0.49  | 0.05 | 0.00 |
|                       | 2 | 3 | 1.48   | 0.05 | 0.00 |
| Length_M01            | 1 | 2 | 14.99  | 0.75 | 0.00 |
|                       |   | 3 | 14.52  | 0.77 | 0.00 |
|                       | 2 | 3 | -0.47  | 0.74 | 0.80 |
| Length_M02            | 1 | 2 | 27.61  | 0.89 | 0.00 |
|                       |   | 3 | 23.07  | 0.91 | 0.00 |
|                       | 2 | 3 | -4.54  | 0.88 | 0.00 |
| Length_M03            | 1 | 2 | -0.59  | 0.66 | 0.64 |
|                       |   | 3 | 8.12   | 0.67 | 0.00 |
|                       | 2 | 3 | 8.71   | 0.65 | 0.00 |

|            |   |   |        |      |      |
|------------|---|---|--------|------|------|
| Length_M04 | 1 | 2 | 44.52  | 1.19 | 0.00 |
|            |   | 3 | 26.55  | 1.22 | 0.00 |
|            | 2 | 3 | -17.97 | 1.17 | 0.00 |
| Length_M05 | 1 | 2 | 11.69  | 0.81 | 0.00 |
|            |   | 3 | 17.84  | 0.83 | 0.00 |
|            | 2 | 3 | 6.15   | 0.80 | 0.00 |
| Length_M06 | 1 | 2 | -18.36 | 0.68 | 0.00 |
|            |   | 3 | -2.17  | 0.70 | 0.01 |
|            | 2 | 3 | 16.19  | 0.67 | 0.00 |
| Width_M01  | 1 | 2 | -2.90  | 0.26 | 0.00 |
|            |   | 3 | 4.92   | 0.27 | 0.00 |
|            | 2 | 3 | 7.82   | 0.26 | 0.00 |
| Width_M02  | 1 | 2 | 1.20   | 0.21 | 0.00 |
|            |   | 3 | 6.69   | 0.21 | 0.00 |
|            | 2 | 3 | 5.49   | 0.20 | 0.00 |
| Width_M03  | 1 | 2 | -10.13 | 0.31 | 0.00 |
|            |   | 3 | 2.68   | 0.31 | 0.00 |
|            | 2 | 3 | 12.81  | 0.30 | 0.00 |
| Width_M04  | 1 | 2 | 5.32   | 0.19 | 0.00 |
|            |   | 3 | 7.09   | 0.19 | 0.00 |
|            | 2 | 3 | 1.77   | 0.19 | 0.00 |
| Width_M05  | 1 | 2 | -6.81  | 0.29 | 0.00 |
|            |   | 3 | 5.18   | 0.29 | 0.00 |
|            | 2 | 3 | 11.99  | 0.28 | 0.00 |
| Width_M06  | 1 | 2 | -15.09 | 0.29 | 0.00 |
|            |   | 3 | -0.97  | 0.30 | 0.00 |
|            | 2 | 3 | 14.12  | 0.29 | 0.00 |
| Height_M01 | 1 | 2 | 2.60   | 0.40 | 0.00 |
|            |   | 3 | 6.95   | 0.40 | 0.00 |
|            | 2 | 3 | 4.35   | 0.39 | 0.00 |
| Height_M02 | 1 | 2 | 8.11   | 0.31 | 0.00 |
|            |   | 3 | 8.90   | 0.32 | 0.00 |
|            | 2 | 3 | 0.78   | 0.31 | 0.03 |
| Height_M03 | 1 | 2 | -7.63  | 0.47 | 0.00 |
|            |   | 3 | 4.52   | 0.48 | 0.00 |
|            | 2 | 3 | 12.16  | 0.46 | 0.00 |
| Height_M04 | 1 | 2 | 12.61  | 0.30 | 0.00 |
|            |   | 3 | 9.64   | 0.30 | 0.00 |
|            | 2 | 3 | -2.97  | 0.29 | 0.00 |

|                                       |   |   |          |         |      |
|---------------------------------------|---|---|----------|---------|------|
| Height_M05                            | 1 | 2 | -3.19    | 0.43    | 0.00 |
|                                       |   | 3 | 7.60     | 0.44    | 0.00 |
|                                       | 2 | 3 | 10.79    | 0.43    | 0.00 |
| Height_M06                            | 1 | 2 | -17.98   | 0.43    | 0.00 |
|                                       |   | 3 | -1.84    | 0.44    | 0.00 |
|                                       | 2 | 3 | 16.15    | 0.43    | 0.00 |
| Raw Centroid X                        | 1 | 2 | 0.34     | 0.25    | 0.37 |
|                                       |   | 3 | 0.15     | 0.26    | 0.83 |
|                                       | 2 | 3 | -0.19    | 0.25    | 0.73 |
| Raw Centroid Y                        | 1 | 2 | 5.31     | 0.41    | 0.00 |
|                                       |   | 3 | 1.82     | 0.43    | 0.00 |
|                                       | 2 | 3 | -3.49    | 0.42    | 0.00 |
| Circularity_Object(M04,Ch04,Tight)    | 1 | 2 | -3.40    | 0.07    | 0.00 |
|                                       |   | 3 | 0.04     | 0.07    | 0.85 |
|                                       | 2 | 3 | 3.45     | 0.07    | 0.00 |
| Bright Detail Intensity<br>R3_MC_Ch01 | 1 | 2 | -2678.25 | 203.95  | 0.00 |
|                                       |   | 3 | 1768.58  | 208.69  | 0.00 |
|                                       | 2 | 3 | 4446.82  | 200.90  | 0.00 |
| Bright Detail Intensity<br>R3_MC_Ch02 | 1 | 2 | 1467.11  | 124.56  | 0.00 |
|                                       |   | 3 | 2967.94  | 127.45  | 0.00 |
|                                       | 2 | 3 | 1500.83  | 122.70  | 0.00 |
| Bright Detail Intensity<br>R3_MC_Ch03 | 1 | 2 | 2910.28  | 78.45   | 0.00 |
|                                       |   | 3 | 2587.08  | 80.28   | 0.00 |
|                                       | 2 | 3 | -323.20  | 77.28   | 0.00 |
| Bright Detail Intensity<br>R3_MC_Ch04 | 1 | 2 | -7781.59 | 2521.47 | 0.01 |
|                                       |   | 3 | 32870.53 | 2580.08 | 0.00 |
|                                       | 2 | 3 | 40652.12 | 2483.80 | 0.00 |
| Bright Detail Intensity<br>R3_MC_Ch05 | 1 | 2 | 3489.77  | 120.53  | 0.00 |
|                                       |   | 3 | 4926.96  | 123.33  | 0.00 |
|                                       | 2 | 3 | 1437.19  | 118.73  | 0.00 |
| Bright Detail Intensity<br>R3_MC_Ch06 | 1 | 2 | 3395.60  | 95.23   | 0.00 |
|                                       |   | 3 | 4325.74  | 97.45   | 0.00 |
|                                       | 2 | 3 | 930.14   | 93.81   | 0.00 |
